# Supplementary material
Source: PubMed Central journal article supplement (PMC3963420)
Supplement: supp_WNL.0000000000000130_Holtbernd_Table_e-1.pdf [file supp_WNL.0000000000000130_Holtbernd_Table_e-1.pdf]

**Table e-1: Demographic data of RBD subjects**

| <b>Groups</b>                       | <b>Cohort 1<br/>(Metabolism)<br/>(n=10)</b> | <b>Cohort 2<sup>c</sup><br/>(Perfusion)<br/>(n=17)</b> | <b>CON(+)<br/>(n=8)</b> | <b>CON(-)<br/>(n=9)</b> |
|-------------------------------------|---------------------------------------------|--------------------------------------------------------|-------------------------|-------------------------|
| <b>Gender F/M</b>                   | 0/10                                        | 3/17                                                   | 1/8                     | 2/9                     |
| <b>Age<sup>a</sup></b>              | 63.5±9.4                                    | 68.9±4.8                                               | 71.4±4.3                | 66.8±4.4                |
| <b>Symptom duration<sup>a</sup></b> | 6.1±3.3                                     | 12.8±9.5                                               | 9.1±6.1                 | 16.0±11.1               |
| <b>UPDRS (motor)<sup>a</sup></b>    | 1.9±2.2                                     | 4.5±3.3                                                | 5.2±3.4                 | 3.9±3.4                 |
| <b>Follow-up time<sup>b</sup></b>   | 1.3±0.7                                     | 4.6±2.5                                                | 3.4±2.1                 | 5.6±2.4                 |

Abbreviations: RBD = REM sleep behavior disorder; CON (+) = RBD subjects who developed clinical signs of either Parkinson's disease (PD) or dementia with Lewy bodies (DLB) during the follow-up period; CON(-) = RBD subjects who did not phenoconvert during follow-up.

<sup>a</sup>At the time of imaging. <sup>b</sup>For phenoconverters (CON(+)): the time (years) between brain imaging and clinical diagnosis; for non-phenoconverters (CON(-)) and Cohort 1 RBD subjects: the time (years) between brain imaging and the most recent clinical follow-up visit. <sup>c</sup>Total number of RBD subjects in Cohort 2 (comprised of CON(+) and CON(-) individuals). Data are presented as mean±SD.
